# Supplementary material for: Physiological concentrations of albumin favor drug binding
Source: Royal Society of Chemistry journal article supplement (doi:10.1039/c5cp03583j), 2015-01-01
Supplement: c5cp03583j1.pdf [file c5cp03583j1.pdf]

## Supplementary Information

### Physiological concentrations of albumin favor drug binding

D. Tatlıdil,<sup>a</sup> M. Ucuncu,<sup>b</sup> and Y. Akdoğan<sup>a</sup>

<sup>a</sup>Materials Science and Engineering Department, İzmir Institute of Technology, 35430 Urla, İzmir, Turkey

<sup>b</sup>Department of Chemistry, İzmir Institute of Technology, 35430 Urla, İzmir, Turkey

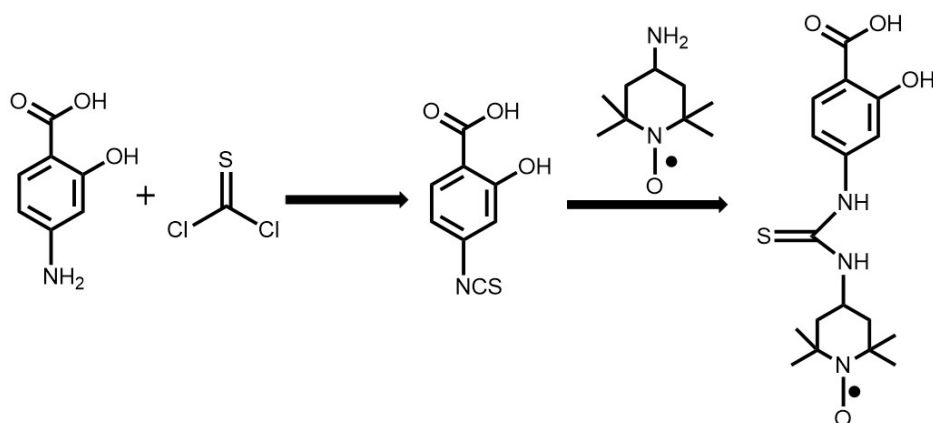

**Fig. S1.** Synthetic route to spin labeled salicylic acid (SLSA) from 4-amino salicylic acid.

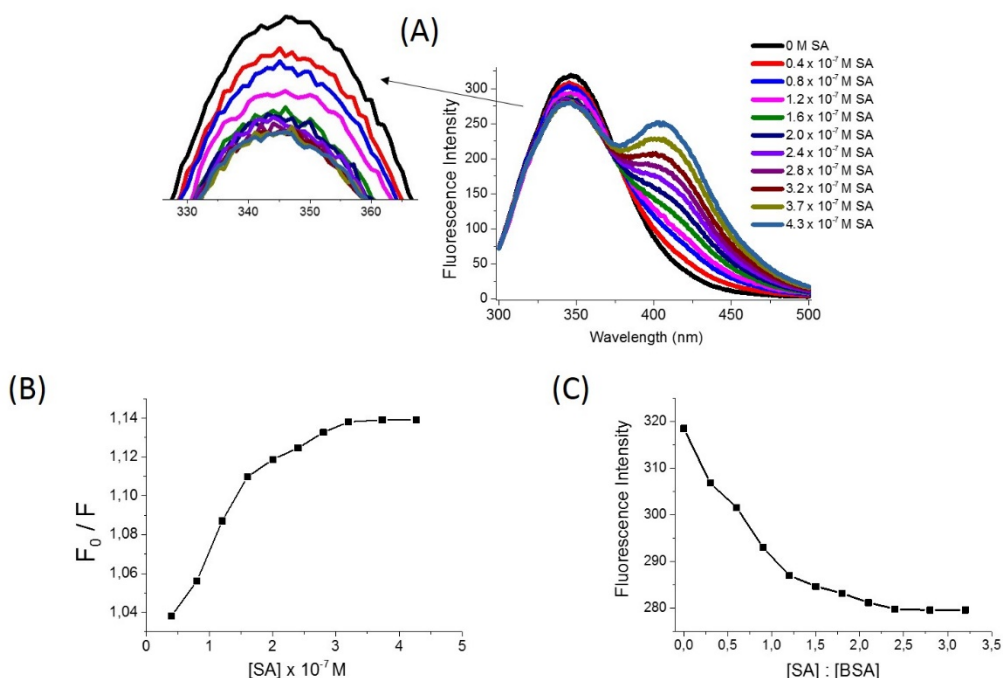

**Fig. S2.** (A) Fluorescence emission spectra of BSA (1.5 x 10<sup>-7</sup> M) in the presence of SA with different concentrations (0-4.3 x 10<sup>-7</sup> M) at 303 K. (B) Stern-Volmer plot of the SA-BSA complexes. F<sub>0</sub> and F are the fluorescence intensities of the BSA before and after the addition of the SA (quencher), respectively. (C) Fluorescence quenching ceased above the ratio of ~2:1 for SA-BSA.

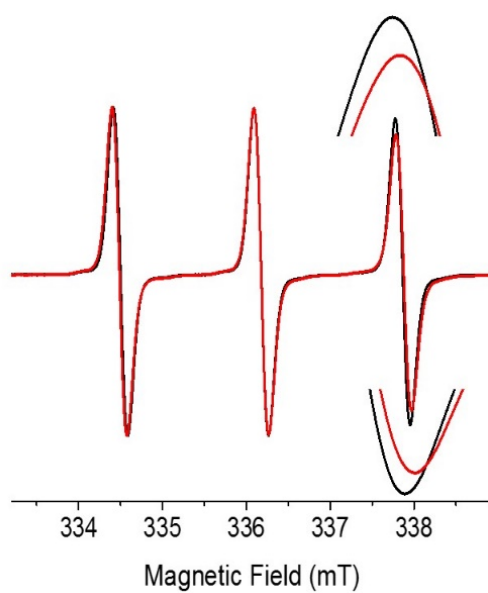

**Fig. S3.** EPR spectra of SLSA (red) and Tempo-4-amino (black) in 0.1 M phosphate buffer solutions containing 1% (v/v) DMSO.

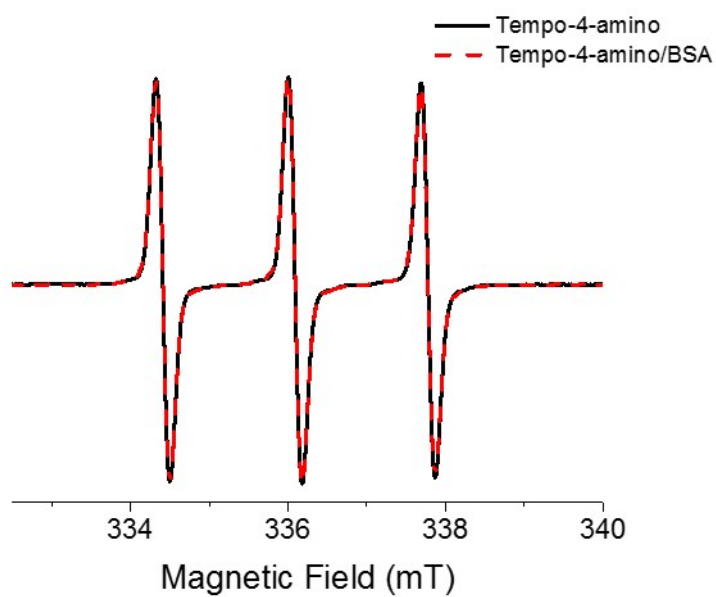

**Fig. S4.** EPR spectra of 0.5 mM Tempo-4-amino (black) and 0.5 mM Tempo-4-amino/BSA complex (1:1) (red dashed line) in 0.1 M phosphate buffer solutions.

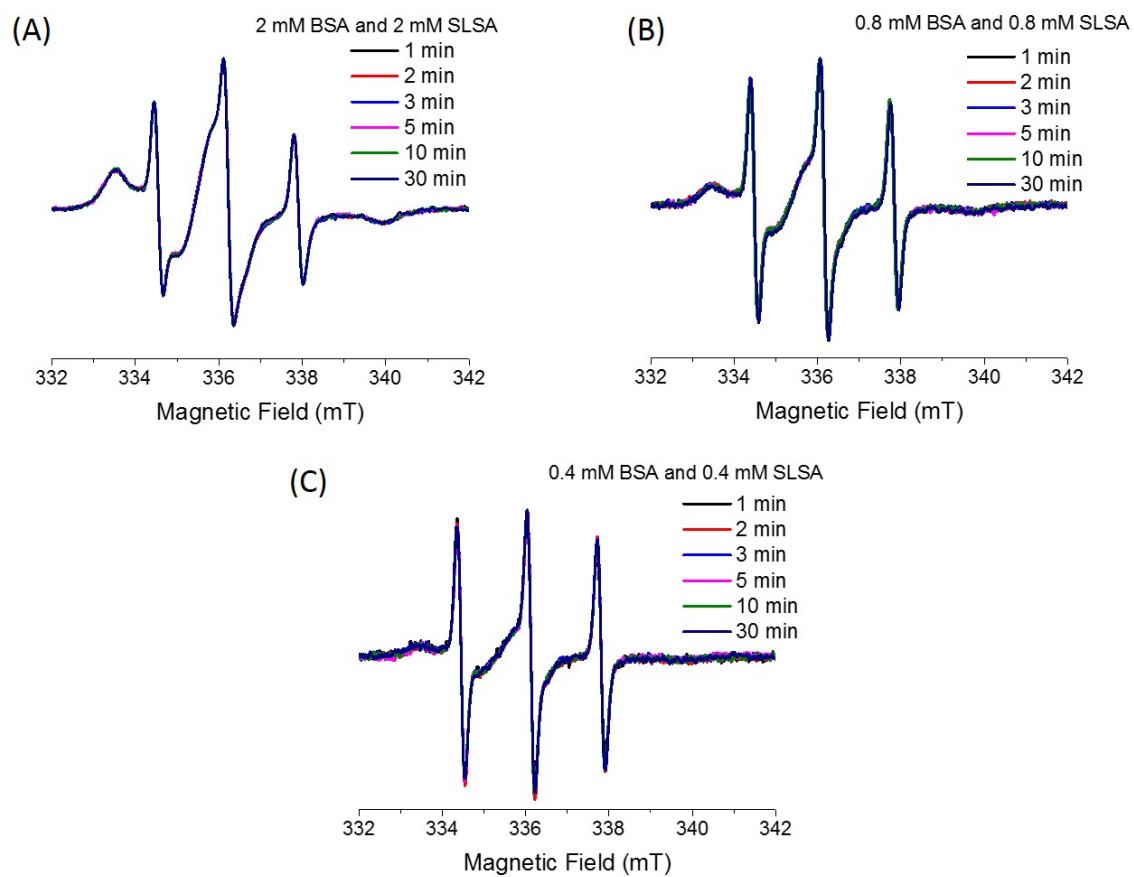

**Fig. S5.** EPR spectra of (A) 2 mM SLSA in 2 mM BSA solution, (B) 0.8 mM SLSA in 0.8 mM BSA solution, and (C) 0.4 mM SLSA in 0.4 mM BSA solution within a period of time after preparation the samples from 1 minute to 30 minutes.

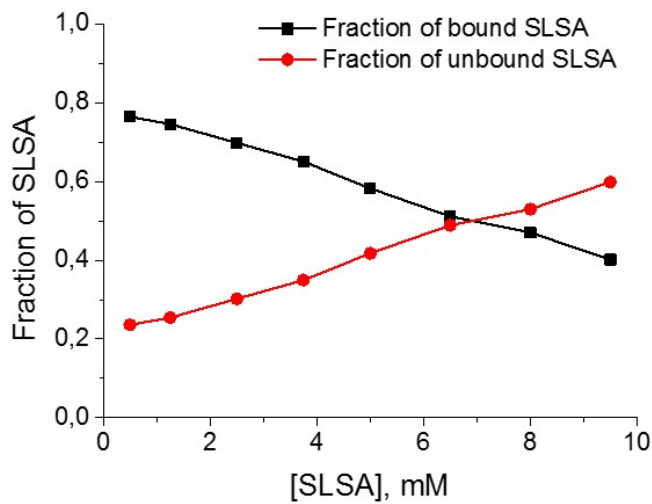

**Fig. S6.** Fractions of bound (black) and unbound (red) SLSA in 0.5 mM BSA/buffer solution obtained from simulations of their EPR spectra. The concentrations of SLSA are 0.5, 1.2, 2.5, 3.7, 5.0, 6.5, 8.0 and 9.5 mM.

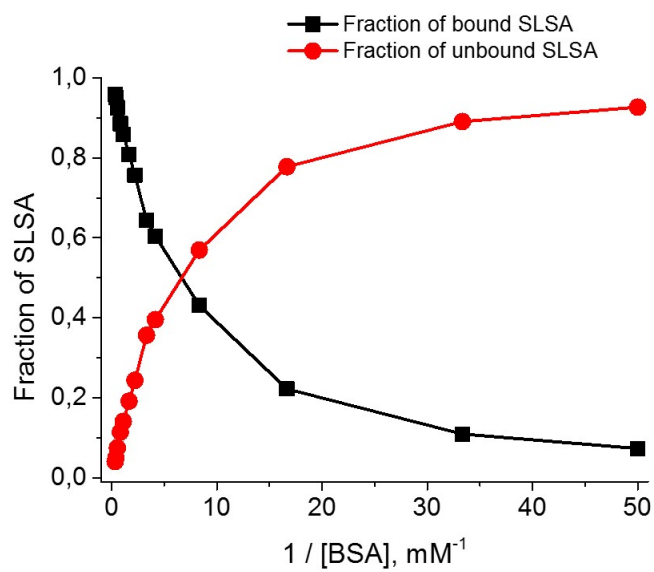

**Fig. S7.** Fractions of bound (black) and unbound (red) SLSA in different concentrations of BSA (0.02 – 3.00 mM) obtained from simulations of their EPR spectra. The concentration of SLSA was kept constant at 0.6 mM.

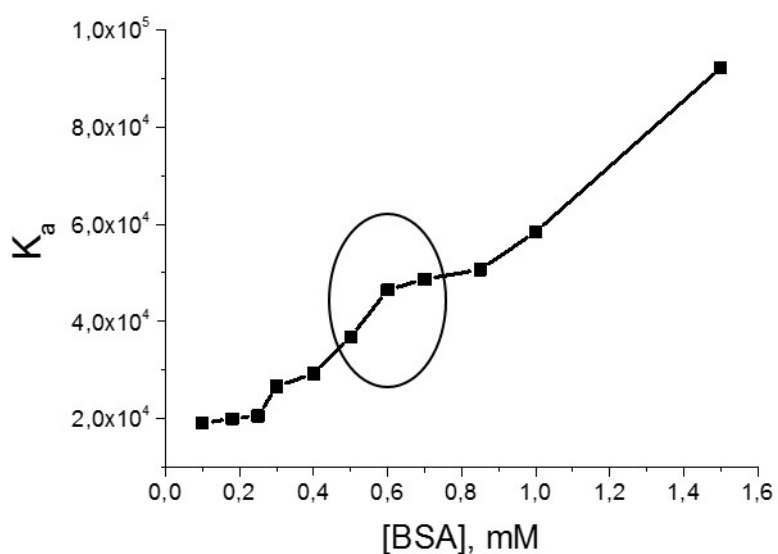

**Fig. S8** The curve of calculated  $K_a$  versus [BSA] concentration for the SLSA-BSA assembly. The circle shows the concentrations of BSA in the physiological range (0.5 – 0.7 mM BSA).

| [BSA], mM | $K_a, 10^4 M^{-1}$ | $\Delta G, kJ mol^{-1}$ |
|-----------|--------------------|-------------------------|
| 0.10      | 1.91               | -24.42                  |
| 0.18      | 1.99               | -24.54                  |
| 0.25      | 2.05               | -24.60                  |
| 0.30      | 2.66               | -25.35                  |
| 0.40      | 2.93               | -25.48                  |
| 0.50      | 3.68               | -26.05                  |
| 0.60      | 4.65               | -26.63                  |
| 0.70      | 4.87               | -26.74                  |
| 0.85      | 5.06               | -26.84                  |
| 1.00      | 5.84               | -27.19                  |
| 1.50      | 9.22               | -28.32                  |

**Table S1.** BSA concentrations, association constants ( $K_a$ ) and binding free energies ( $\Delta G$ ) of SLSA-BSA complexes.
